# Supplementary material
Source: PubMed Central journal article supplement (PMC4213265)
Supplement: NIHMS623256-supplement-Supp_Material.pdf [file NIHMS623256-supplement-Supp_Material.pdf]

## **SUPPORTING INFORMATION**

### ***SUPP. MATERIALS AND METHODS***

#### **Reagents and Antibodies**

EGF was obtained from BD Bioscience. Cycloheximide was purchased from ENZO. Specific proteins were detected using the following primary antibodies: EGFR, RAF-1(S338), ERK1/2, phospho-ERK1/2, MEK1/2, GAPDH (Cell Signaling); SHOC2 (Genetex, Proteintech), tRFP (Evrogen); GST, HA, M-Ras, RAF-1, phospho-MEK1/2 (Santa Cruz) and PP1 (Millipore).

#### **Expression Plasmids**

SHOC2-tRFP and GST-SHOC2 expressing constructs were described previously [Galperin, Abdelmoti et al. 2012, Jeoung and Galperin 2014]. 3xHA-MRAS was purchased from Missouri S&T cDNA Resource Center ([www.cdna.org](http://www.cdna.org)). To generate the plasmids expressing either SHOC2(M173I)-tRFP or GST-SHOC2(M173I), a point mutations in the SHOC2-tRFP or GST-SHOC2 construct were introduced using a QuickChange site-directed mutagenesis kit according to the manufacturer's directions (Stratagene). The following primers were used: 5'-AAGAAGCTGCGGATACTTGATTTACGG-3' and 5'-CCGTAAATCAAGTATCCGCAGCTTCTT-3'. All constructs was verified by dideoxynucleotide sequencing.

#### **Cell Culture and DNA Transfections**

293FT cells (Invitrogen) and Cos-1 (ATCC), and stable cell lines (derivatives of Cos-1 cells) were grown in Dulbecco Modified Eagle's Medium (DMEM) containing 10% fetal bovine serum (FBS) supplemented with, MEM-NEAA, Penicillin, Streptomycin, and L-Glutamate (Invitrogen). Cos1-LV1 cells expressing SHOC2-tRFP and SHOC2 shRNA were described previously [Jeoung and Galperin 2014]. The transfections of DNA constructs were performed using PEI (Neo Transduction Laboratories, Lexington, KY) or *TransIT*® (Mirus Bio LLC) reagents. Expression of tagRFP-fused proteins was confirmed by Western blotting as described below.

**Immunoprecipitation and Western blot analysis**

Immunoprecipitation was performed as described in [Galperin, Abdelmoti et al. 2012]. Immunoprecipitates and aliquots of cell lysates were denatured in the sample buffer at 95 °C, resolved by electrophoresis, and probed by Western blotting with various antibodies followed by the chemiluminescence detection as described previously [Jeoung, Abdelmoti et al. 2013]. Proteins transferred from SDS-PAGE gels to nitrocellulose membranes were visualized using the ChemiDoc analysis system (Bio-Rad). The quantifications were performed using densitometry analysis mode of the Image Lab software (Bio-Rad, Inc).

**Statistical analysis**

Datasets were first tested for normality and homogeneity of variance. When appropriate, data were transformed before statistical analysis. Nontransformed data are depicted in all the figures. One-way ANOVA using SigmaStat 3.5 (Systat Software, Inc., Point Richmond, CA) was used to determine differences pERK1/2 activation levels. If differences were detected, Tukey's test was used to determine which means differed. The Student's *t*-test was used to determine differences in pRAF-1 activation.

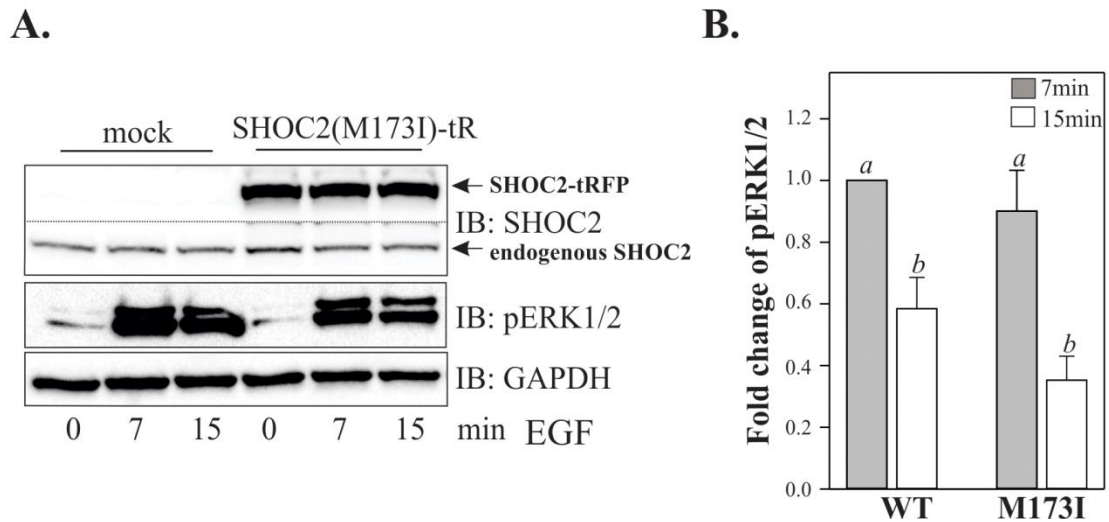

**Supp. Figure S1.** Overexpression of SHOC2 M173I mutants in cells does not affect ERK1/2 activity. **A.** Cos1 cells were transiently transfected with SHOC2(M173)-tRFP truncated mutants and treated as in A. The lysates were probed by immunoblotting (IB) for SHOC2, activated ERK1/2 (pERK1/2), and GAPDH (loading control). **B.** Multiple blots from the experiments exemplified in A were analyzed. Bars represent the mean values ( $\pm$ S.E.,  $n = 3$ ) of phosphorylated ERK1/2 activity normalized to total ERK1/2 in arbitrary units (pERK/ERK) (a,  $P = 0.1$ , b vs. c,  $P = 0.023$ ).

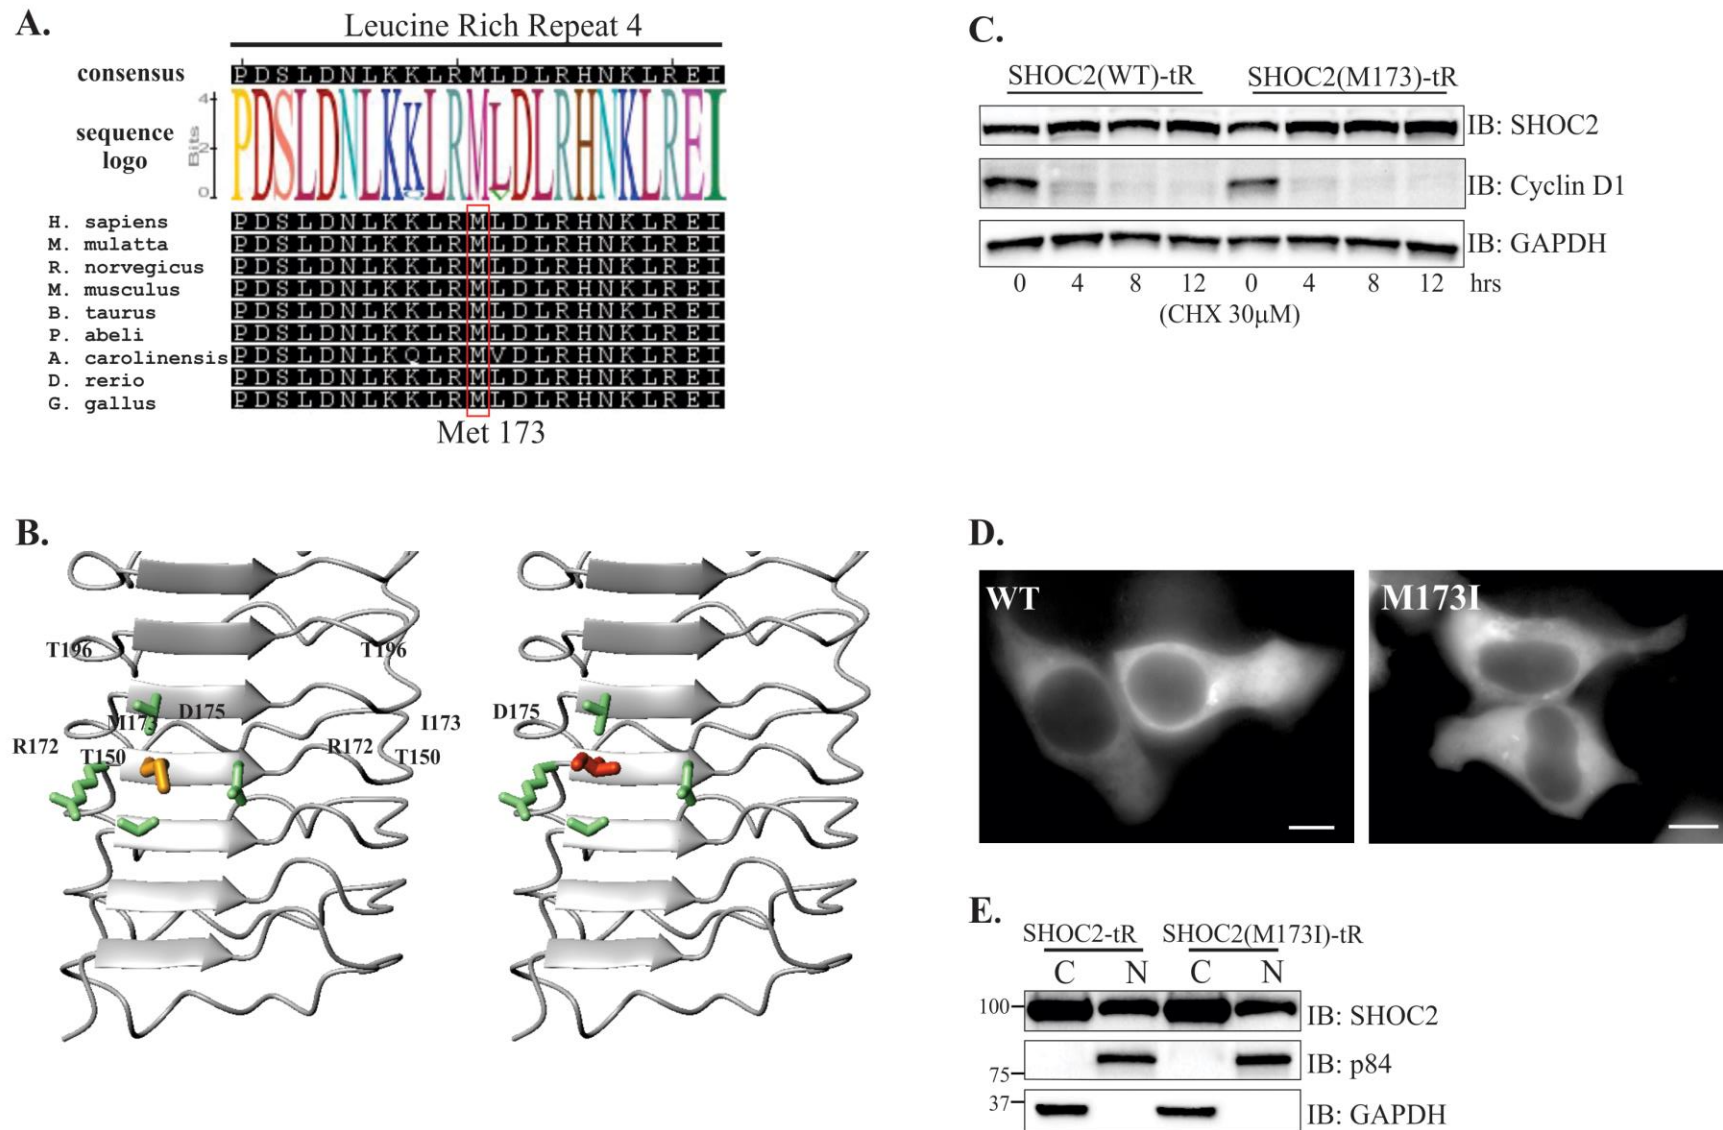

**Supp. Figure S2.** Protein half-life and cellular distribution of the SHOC2(M173I)-tRFP mutant are not altered. **A.** Multiple alignment of the LRR4s of nine SHOC2 orthologues. The motif includes conserved sequence positions for the LRR4. Residue conservation color

scheme: residues boxed in black are identical, and those boxed in dark and light grey are conserved substitutions. **B.** Superimposed ribbon representation of the model structure of WT SHOC2 and the M173I mutant of SHOC2 with amino acid residues clustered around M173 highlighted. **C.** Cos-LV1 cells were transiently transfected with SHOC2-tRFP or the SHOC2(M173I)-tRFP mutant. Thirty-six hours post-transfection cells were treated with 30  $\mu$ M Cycloheximide for indicated times at 37°C. The lysates were probed by immuno-blotting (IB) for SHOC2, Cyclin D1 and GAPDH (loading control). **D.** Cos-LV1 cells were transfected with SHOC2-tRFP and the SHOC2(M173I)-tRFP and imaged live. SHOC2-tRFP was detected using Cy3 (for tagRFP) filter channels for imaging of living cells. Scale bar, 10  $\mu$ m. **E.** Cos-LV1 cells were transfected with full-length SHOC2-tRFP or the SHOC2(M173I)-tRFP mutant, and subjected to the cell fractionation. Cell lysates were immunoblotted (IB) with SHOC2 Abs to monitor expression of SHOC2, and p84 (nuclear fraction-N) Abs and GAPDH (cytosolic fraction-C) to control for the purity of fractions. 30  $\mu$ g of total lysate for each fraction was loaded for IB analysis. Results in each panel are representative of three independent experiments.

### Supporting Information Legends

NP\_031399.2- Homo sapiens, NP\_001095413.1-Bos taurus, NP\_062632.2-Mus musculus, NP\_001013173.1-Rattus norvegicus, NP\_001026407.1-Gallus gallus, NP\_001038251.1-Danio rerio, NP\_001026407.1-Gallus gallus, NP\_001244517.1-Macaca mulatta, XP\_003218575.1-Anolis carolinensis. Accession number of SHOC2 orthologues in databases (EMBL and NCBI).

**Supp. Table S1. Clinical presentation of NS, CFC, NS/LAH Rasopathies and germ line mutation analysis of SHOC2**

|                           | NS                                                         | CFC                     | NS/LAH | PT 1  | PT 2  |
|---------------------------|------------------------------------------------------------|-------------------------|--------|-------|-------|
| Cardiac /ECG defects      | 90%                                                        | +                       | most   | -     | -     |
| Short stature             | ~70%                                                       | most                    | most   | -     | -     |
| GH deficiency             | -                                                          | -                       | +      | -     | -     |
| Hyperpigmented skin       | CALS                                                       | +                       | ~75%   | -     | -     |
| Lymphatic dysplasia       | +                                                          | +                       | ND     | -     | -     |
| Anagen hair               | -                                                          | -                       | +      | -     | -     |
| Hyperkeratosis/eczema     | -                                                          | +                       | ~50%   | -     | -     |
| Ptosis                    | +                                                          | +                       | +      | +     | -     |
| Ocular anomalies          | +                                                          | +                       | +      | +     | -     |
| Macrocephaly              | ±                                                          | +                       | most   | +     | -     |
| Abnormal nails            | -                                                          | +                       | ND     | +     | +     |
| Brain anomalies           | rare                                                       | +                       | +      | +     | ND    |
| High-arched palate        | +                                                          | +                       | ND     | -     | +     |
| Hyperactive/ADHD          | ±                                                          | +                       | ~50%   | +     | -     |
| Sparse, slow growing hair | rare                                                       | +                       | most   | +     | +     |
| Developmental delay       | 25%-30%                                                    | +                       | +      | +     | +     |
| Intellectual disability   | Mild 1/3                                                   | most                    | most   | ?     | Mild  |
| Genes                     | PTPN11, SOS1,<br>RAF1, KRAS,<br>NRAS, BRAF,<br>MAP2K1, CBL | BRAF, KRAS,<br>MAP2K1/2 | SHOC2  | SHOC2 | SHOC2 |
